# Supplementary material
Source: Research Square preprint supplement (doi:10.21203/rs.3.rs-9721219/v1)
Supplement: Supplementary file 1 [file fd0acaa68d0430a5028921b1.pdf]

# Supplementary Material for “Hamiltonian Dynamics of a Geometric Scalar Field on Superspace”

Avadhut V. Purohit<sup>1,\*</sup>

<sup>1</sup>Department of Physics, Visvesvaraya National Institute of Technology, Nagpur 440010, India

(Dated: May 14, 2026)

## Contents

|                                 |   |
|---------------------------------|---|
| SI Stress-energy tensor         | 1 |
| SII Riccati Equation            | 2 |
| SII.A Uniqueness of Solution    | 2 |
| SII.B Structure of the Solution | 3 |
| References                      | 4 |

## SI Stress-energy tensor

We derive the effective spacetime stress-energy tensor associated with the geometric scalar field  $\Phi$ , which is defined as follows:

$$T_{ab} = -\frac{2}{\sqrt{q}} \frac{\delta S}{\delta q^{ab}}, \quad (\text{S1})$$

where  $S$  is the action for the free geometric scalar field  $\Phi$  discussed in the main text and  $q_{ab}$  is the induced metric on the spatial hypersurface given by

$$q_{ab} = \mathcal{G}_{\mu\nu} \frac{\partial \zeta^\mu}{\partial x^a} \frac{\partial \zeta^\nu}{\partial x^b}. \quad (\text{S2})$$

The variation of the action with respect to  $q^{ab}$  is computed as follows:

$$\frac{\delta S}{\delta q^{ab}} = \int d^{d+1} \zeta \left[ \frac{\delta \sqrt{-\mathcal{G}}}{\delta q^{ab}} \mathcal{L} + \sqrt{-\mathcal{G}} \frac{\delta \mathcal{L}}{\delta q^{ab}} \right] = \int d^{d+1} \zeta \left[ -\frac{1}{2} \sqrt{-\mathcal{G}} q_{ab} \mathcal{L} + \sqrt{-\mathcal{G}} \frac{\delta \mathcal{L}}{\delta q^{ab}} \right]. \quad (\text{S3})$$

Since we are mainly interested in the flat spacetime limit, we set  $\mu^2 = 0$  and the Lagrangian density reduces to the following form:

$$\mathcal{L} = -\frac{1}{2} \mathcal{G}^{\mu\nu} \partial_\mu \Phi \partial_\nu \Phi. \quad (\text{S4})$$

Thus, the variation of the Lagrangian density with respect to  $q^{ab}$  is given by

$$\frac{\delta \mathcal{L}}{\delta q^{ab}} = -\frac{1}{2} \frac{\delta \mathcal{G}^{\mu\nu}}{\delta q^{ab}} \partial_\mu \Phi \partial_\nu \Phi. \quad (\text{S5})$$

Since  $\mathcal{G}^{00} = -1$ ,  $\mathcal{G}^{AB} = \frac{32}{3} \zeta^{-2} \bar{\mathcal{G}}^{AB}$  and  $\zeta = \sqrt{\frac{32}{3}} (\det q_{ab})^{\frac{1}{4}}$ , the above expression can be computed as follows:

$$\frac{\delta \mathcal{L}}{\delta q^{ab}} = -\frac{16}{3} \zeta^{-2} \left( \frac{\delta \bar{\mathcal{G}}^{AB}}{\delta q^{ab}} + \frac{1}{2} q_{ab} \bar{\mathcal{G}}^{AB} \right) \partial_A \Phi \partial_B \Phi. \quad (\text{S6})$$

---

\* avdhoot.purohit@gmail.com

Here, the second term is obtained using the following identity:

$$\frac{\delta\zeta^{-2}}{\delta q^{ab}} = \frac{1}{2}q_{ab}\zeta^{-2}. \quad (\text{S7})$$

Then, collecting all the terms, we obtain the following expression for the stress-energy tensor:

$$T_{ab} = -\frac{2}{\zeta^2} \int d\zeta \int d\zeta^A \sqrt{-\mathcal{G}} \left[ \frac{1}{4}q_{ab}\mathcal{G}^{\mu\nu}\partial_\mu\Phi\partial_\nu\Phi - \frac{16}{3}\zeta^{-2} \left( \frac{\delta\bar{\mathcal{G}}^{AB}}{\delta q^{ab}} + \frac{1}{2}q_{ab}\bar{\mathcal{G}}^{AB} \right) \partial_A\Phi\partial_B\Phi \right]. \quad (\text{S8})$$

Since we are interested in the  $\zeta$ -dependence of the stress-energy tensor, we solve the KG-like equation for the free geometric scalar field  $\Phi$  in the flat spacetime background, which is given by

$$\left[ \frac{\partial^2}{\partial\zeta^2} + \frac{d}{\zeta} \frac{\partial}{\partial\zeta} - \frac{\lambda}{\zeta^2} \right] \Phi = 0, \quad \text{where} \quad \frac{32}{3} \frac{1}{\sqrt{\bar{\mathcal{G}}}} \partial_A \left( \sqrt{\bar{\mathcal{G}}} \bar{\mathcal{G}}^{AB} \partial_B \right) \Phi = \lambda \Phi. \quad (\text{S9})$$

The solution to the above equation has the following form:

$$\Phi \sim \zeta^{-\frac{(d-1)}{2} \pm \sqrt{\left(\frac{d-1}{2}\right)^2 - 4\lambda}} f(\zeta^A). \quad (\text{S10})$$

If anisotropies are such that  $\lambda$  is large and positive, the second-half part of the solution is oscillatory, and the dominating part of the solution is  $\Phi \sim \zeta^{-\frac{(d-1)}{2}}$ . For  $\lambda < 0$  and large in magnitude, the decaying branch becomes strongly suppressed at large  $\zeta$ , while the growing branch is excluded on physical grounds (the positive part is unphysical and the negative part survives). In general,  $\lambda$  determines the  $\zeta$ -dependence of the geometric modes.

Substituting the asymptotic solution into Eq. (S8), we can determine the leading  $\zeta$ -dependence of the stress-energy tensor. The leading  $\zeta$ -dependence of the stress-energy tensor is given by

$$T_{ab} = -\frac{2}{\zeta^2} \int d\zeta \int d\zeta^A \sqrt{-\mathcal{G}} \left[ \frac{1}{4}q_{ab} \left( (\partial_\zeta\Phi)^2 - \frac{32}{3\zeta^2} \bar{\mathcal{G}}^{AB} \partial_A\Phi\partial_B\Phi \right) - \frac{16}{3\zeta^2} \left( \frac{\delta\bar{\mathcal{G}}^{AB}}{\delta q^{ab}} + \frac{1}{2}q_{ab}\bar{\mathcal{G}}^{AB} \right) \partial_A\Phi\partial_B\Phi \right]. \quad (\text{S11})$$

Using the leading order solution  $\Phi \sim \zeta^{-\frac{(d-1)}{2}} f(\zeta^A)$ , we obtain the following leading  $\zeta$ -dependence of the stress-energy tensor:

$$\begin{aligned} T_{ab} &\approx -\frac{2}{\zeta^2} \int d\zeta \int d\zeta^A \sqrt{\bar{\mathcal{G}}} \left( \frac{3}{32} \right)^{\frac{d}{2}} \zeta^d \left[ \frac{1}{4}q_{ab}\zeta^{-(d+1)} \left( f^2 - \frac{32}{3} \bar{\mathcal{G}}^{AB} \partial_A f \partial_B f \right) - \frac{16}{3} \zeta^{-(d+1)} \left( \frac{\delta\bar{\mathcal{G}}^{AB}}{\delta q^{ab}} + \frac{1}{2}q_{ab}\bar{\mathcal{G}}^{AB} \right) \partial_A f \partial_B f \right] \\ &\approx -\frac{2}{\zeta^2} \ln \zeta \int d\zeta^A \sqrt{\bar{\mathcal{G}}} \left( \frac{3}{32} \right)^{\frac{d}{2}} \left[ \frac{1}{4}q_{ab} \left( f^2 - \frac{32}{3} \bar{\mathcal{G}}^{AB} \partial_A f \partial_B f \right) - \frac{16}{3} \left( \frac{\delta\bar{\mathcal{G}}^{AB}}{\delta q^{ab}} + \frac{1}{2}q_{ab}\bar{\mathcal{G}}^{AB} \right) \partial_A f \partial_B f \right] \sim q_{ab}\zeta^{-2}. \end{aligned} \quad (\text{S12})$$

Since the logarithmic dependence varies slowly at large  $\zeta$ , the dominant asymptotic scaling is  $T_{ab} \sim \zeta^{-2}$ .

## SII Riccati Equation

We discuss the uniqueness of the structure of the Riccati Eq. (??) given in the main text. Its general form is given by

$$\omega(\zeta, \vec{\zeta})^2 - \frac{1}{\alpha(\zeta)} \nabla_A \left( n^A \omega(\zeta, \vec{\zeta}) \right) = \mu(\zeta, \vec{\zeta})^2, \quad \alpha(\zeta) = \sqrt{\frac{3\zeta^2}{32}} \quad \text{and} \quad \nabla_A V^A = \frac{1}{\sqrt{\bar{\mathcal{G}}}} \partial_A \left( \sqrt{\bar{\mathcal{G}}} V^A \right). \quad (\text{S13})$$

### SII.A Uniqueness of Solution

Applying identity  $\nabla_A(n^A\omega) = n^A\nabla_A\omega + (\nabla_A n^A)\omega$ , we rewrite the above equation as follows:

$$n^A\nabla_A\omega + \theta\omega = \alpha(\zeta) \left( \omega^2 - \mu^2 \right) \quad \text{and} \quad \theta := \nabla_A n^A. \quad (\text{S14})$$

Let  $x^A(s)$  be integral curves of  $n^A$ , defined by

$$\frac{dx^A}{ds} = n^A. \quad (\text{S15})$$

Then the equation reduces along each curve to the ordinary differential equation given by

$$\frac{d\omega}{ds} = F(s, \omega), \quad \text{where} \quad F(s, \omega(\zeta(s)^\mu, s)) = \alpha(\zeta(s)) \left( \omega(\zeta(s)^\mu, s)^2 - \mu(\zeta(s)^\mu, s)^2 \right) - \theta(s) \omega(\zeta(s)^\mu, s). \quad (\text{S16})$$

a. *Local Uniqueness:* Since the function  $F(s, \omega)$  is continuous in  $s$  and smooth in  $\omega$ , its derivative with respect to  $\omega$ :

$$\frac{\partial F}{\partial \omega} = 2\alpha(\zeta(s))\omega - \theta(s), \quad (\text{S17})$$

is continuous for all finite  $\omega$ . Therefore,  $F(s, \omega)$  is locally Lipschitz in  $\omega$ . By the Picard–Lindelöf theorem [1, 2], for any initial condition  $\omega(s_0) = \omega_0$ , there exists a unique local solution along each integral curve of  $n^A$ .

b. *Global Uniqueness:* The solution extends uniquely as long as  $\omega(s)$  remains finite, and this finiteness is assumed within the physically admissible sector considered in the present framework.

c. *Conclusion:* For smooth background fields  $n^A$ ,  $\zeta$ , and  $\mu$ , the above Riccati equation admits a unique local solution along each integral curve of  $n^A$ , given initial data.

### SII.B Structure of the Solution

We introduce the following transformation:

$$\omega(s) = -\frac{1}{\alpha(\zeta(s))} \frac{u'(s)}{u(s)}, \quad (\text{S18})$$

to reduce the above nonlinear equation to a second-order linear equation as follows:

$$u''(s) + \theta(s)u'(s) + \alpha(\zeta(s))^2 \mu(\zeta(s)^\mu, s)^2 u(s) = 0. \quad (\text{S19})$$

a. *General Solution:* The evolution equation along integral curves of  $n^A$  is given by

$$\frac{d\omega(s)}{ds} = \alpha(s)\omega(s)^2 - \theta(s)\omega(s) - \alpha(s)\mu(s)^2, \quad (\text{S20})$$

where we denote:

$$\alpha(s) := \sqrt{\frac{3\zeta(s)^2}{32}} \quad \text{and} \quad \theta(s) := \nabla_A n^A. \quad (\text{S21})$$

b. *Exact Reduction:* To account for the  $s$ -dependence of  $\alpha(s)$ , we use the following transformation:

$$\omega(s) = -\frac{1}{\alpha(s)} \frac{u'(s)}{u(s)}. \quad (\text{S22})$$

Substituting and simplifying, we obtain the linear second-order equation as follows:

$$u''(s) + \left(\theta(s) - \frac{\alpha'(s)}{\alpha(s)}\right)u'(s) + \alpha(s)^2 \mu(s)^2 u(s) = 0. \quad (\text{S23})$$

c. *General Solution:* Let  $u_1(s)$  and  $u_2(s)$  be two linearly independent solutions of the above equation. Then the general solution is given by

$$u(s) = C_1 u_1(s) + C_2 u_2(s), \quad (\text{S24})$$

and the corresponding solution for  $\omega(s)$  is given by

$$\omega(s) = -\frac{1}{\alpha(s)} \frac{d}{ds} \ln[C_1 u_1(s) + C_2 u_2(s)]. \quad (\text{S25})$$

d. *Solution in Integral Form:* Alternatively, the Riccati equation may be written in integral form as follows:

$$\omega(s) = \omega_0 + \int_{s_0}^s ds' \left[ \alpha(s')(\omega(s')^2 - \mu(s')^2) - \theta(s')\omega(s') \right], \quad (\text{S26})$$

which provides an implicit representation suitable for iterative or numerical construction.

*e. Special Case:* If  $\alpha, \theta, \mu$  are constant along a given integral curve, the equation reduces to

$$\frac{d\omega}{ds} = \alpha \omega^2 - \theta \omega - \alpha \mu^2, \quad (\text{S27})$$

which admits the explicit solution

$$\omega(s) = \frac{\omega_+ - C \omega_- e^{\alpha(\omega_+ - \omega_-)(s-s_0)}}{1 - C e^{\alpha(\omega_+ - \omega_-)(s-s_0)}}, \quad (\text{S28})$$

where

$$\omega_{\pm} = \frac{\theta \pm \sqrt{\theta^2 + 4\alpha^2 \mu^2}}{2\alpha} \quad \text{and} \quad C = \frac{\omega_0 - \omega_+}{\omega_0 - \omega_-}. \quad (\text{S29})$$

*f. Remarks:* The above expressions provide the complete solution along each integral curve of  $n^A$ . The nonlinear evolution of  $\omega$  is, thus, fully determined by the geometry through  $\theta(s)$ , the scale factor  $\zeta(s)$ , and the effective mass function  $\mu(s)$ .

- 
- [1] E. A. Coddington and N. Levinson, *Theory of Ordinary Differential Equations* (McGraw-Hill, 1955).  
 [2] V. I. Arnold, *Ordinary Differential Equations* (Springer, 1992).
